# Supplementary material
Source: Springer Nature journal article supplement (https://www.springermedizin.de/resource/supplementary/13075_2010_9754_MOESM4_ESM.pdf/9693356)
Supplement: MOESM4 [file 9693356]

**A/ Immune complexe formation**

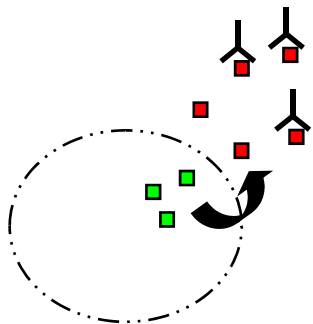

**B/ Immune complexe uptake**

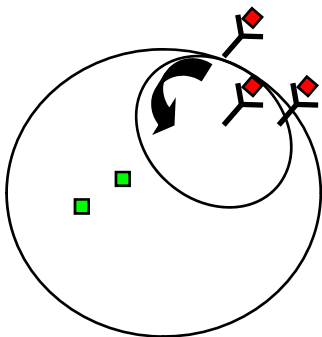

**C/ Immune complexe dissociation and BRAF activation**

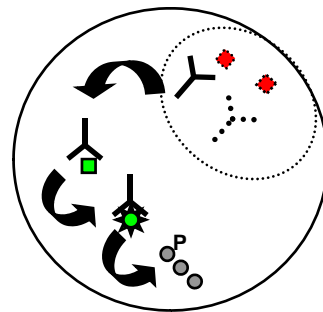

 Autoantibodies to BRAF

 Extracellular BRAF

 Intracellular BRAF

 Active BRAF

 MAP kinase pathway
